# Supplementary material
Source: Springer Nature journal article supplement (https://www.springermedizin.de/resource/supplementary/12890_2008_167_MOESM5_ESM.pdf/9506128)

**CC16**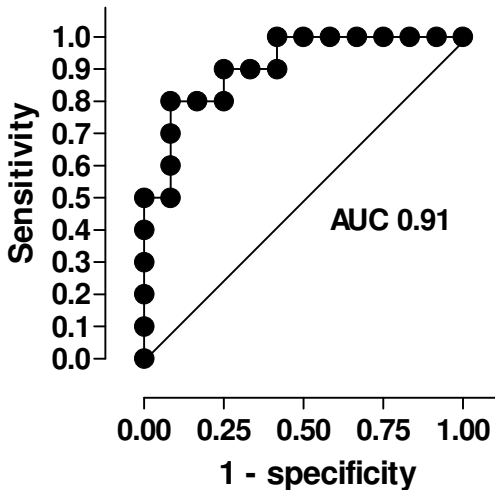**SP-D**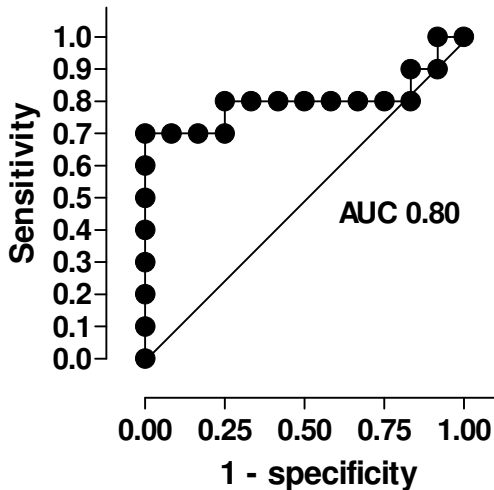**sRAGE**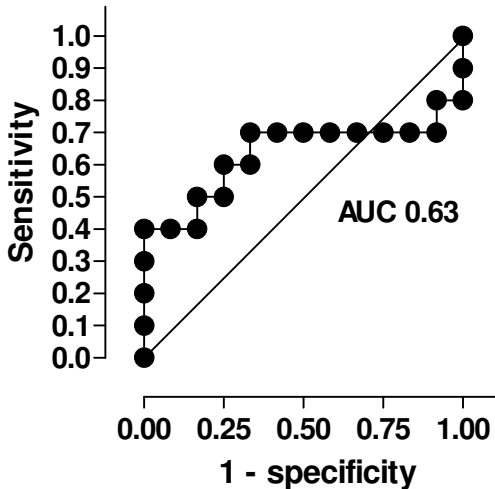**KL-6**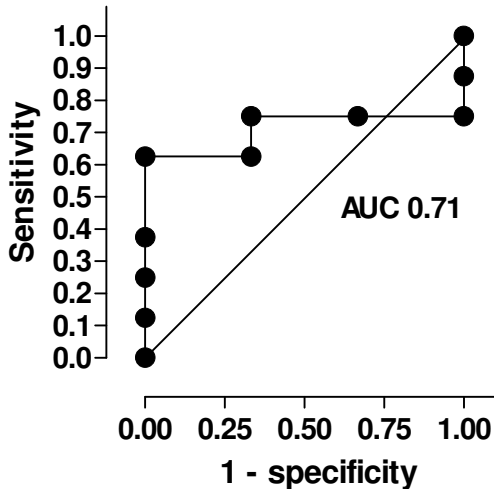

Supplement: MOESM5 [file 9506128]
